# Supplementary material for: Discordant bioinformatic predictions of antimicrobial resistance from whole-genome sequencing data of bacterial isolates: An inter-laboratory study
Source: bioRxiv or medRxiv preprint supplement (doi:10.1101/793885), 2019-10-08

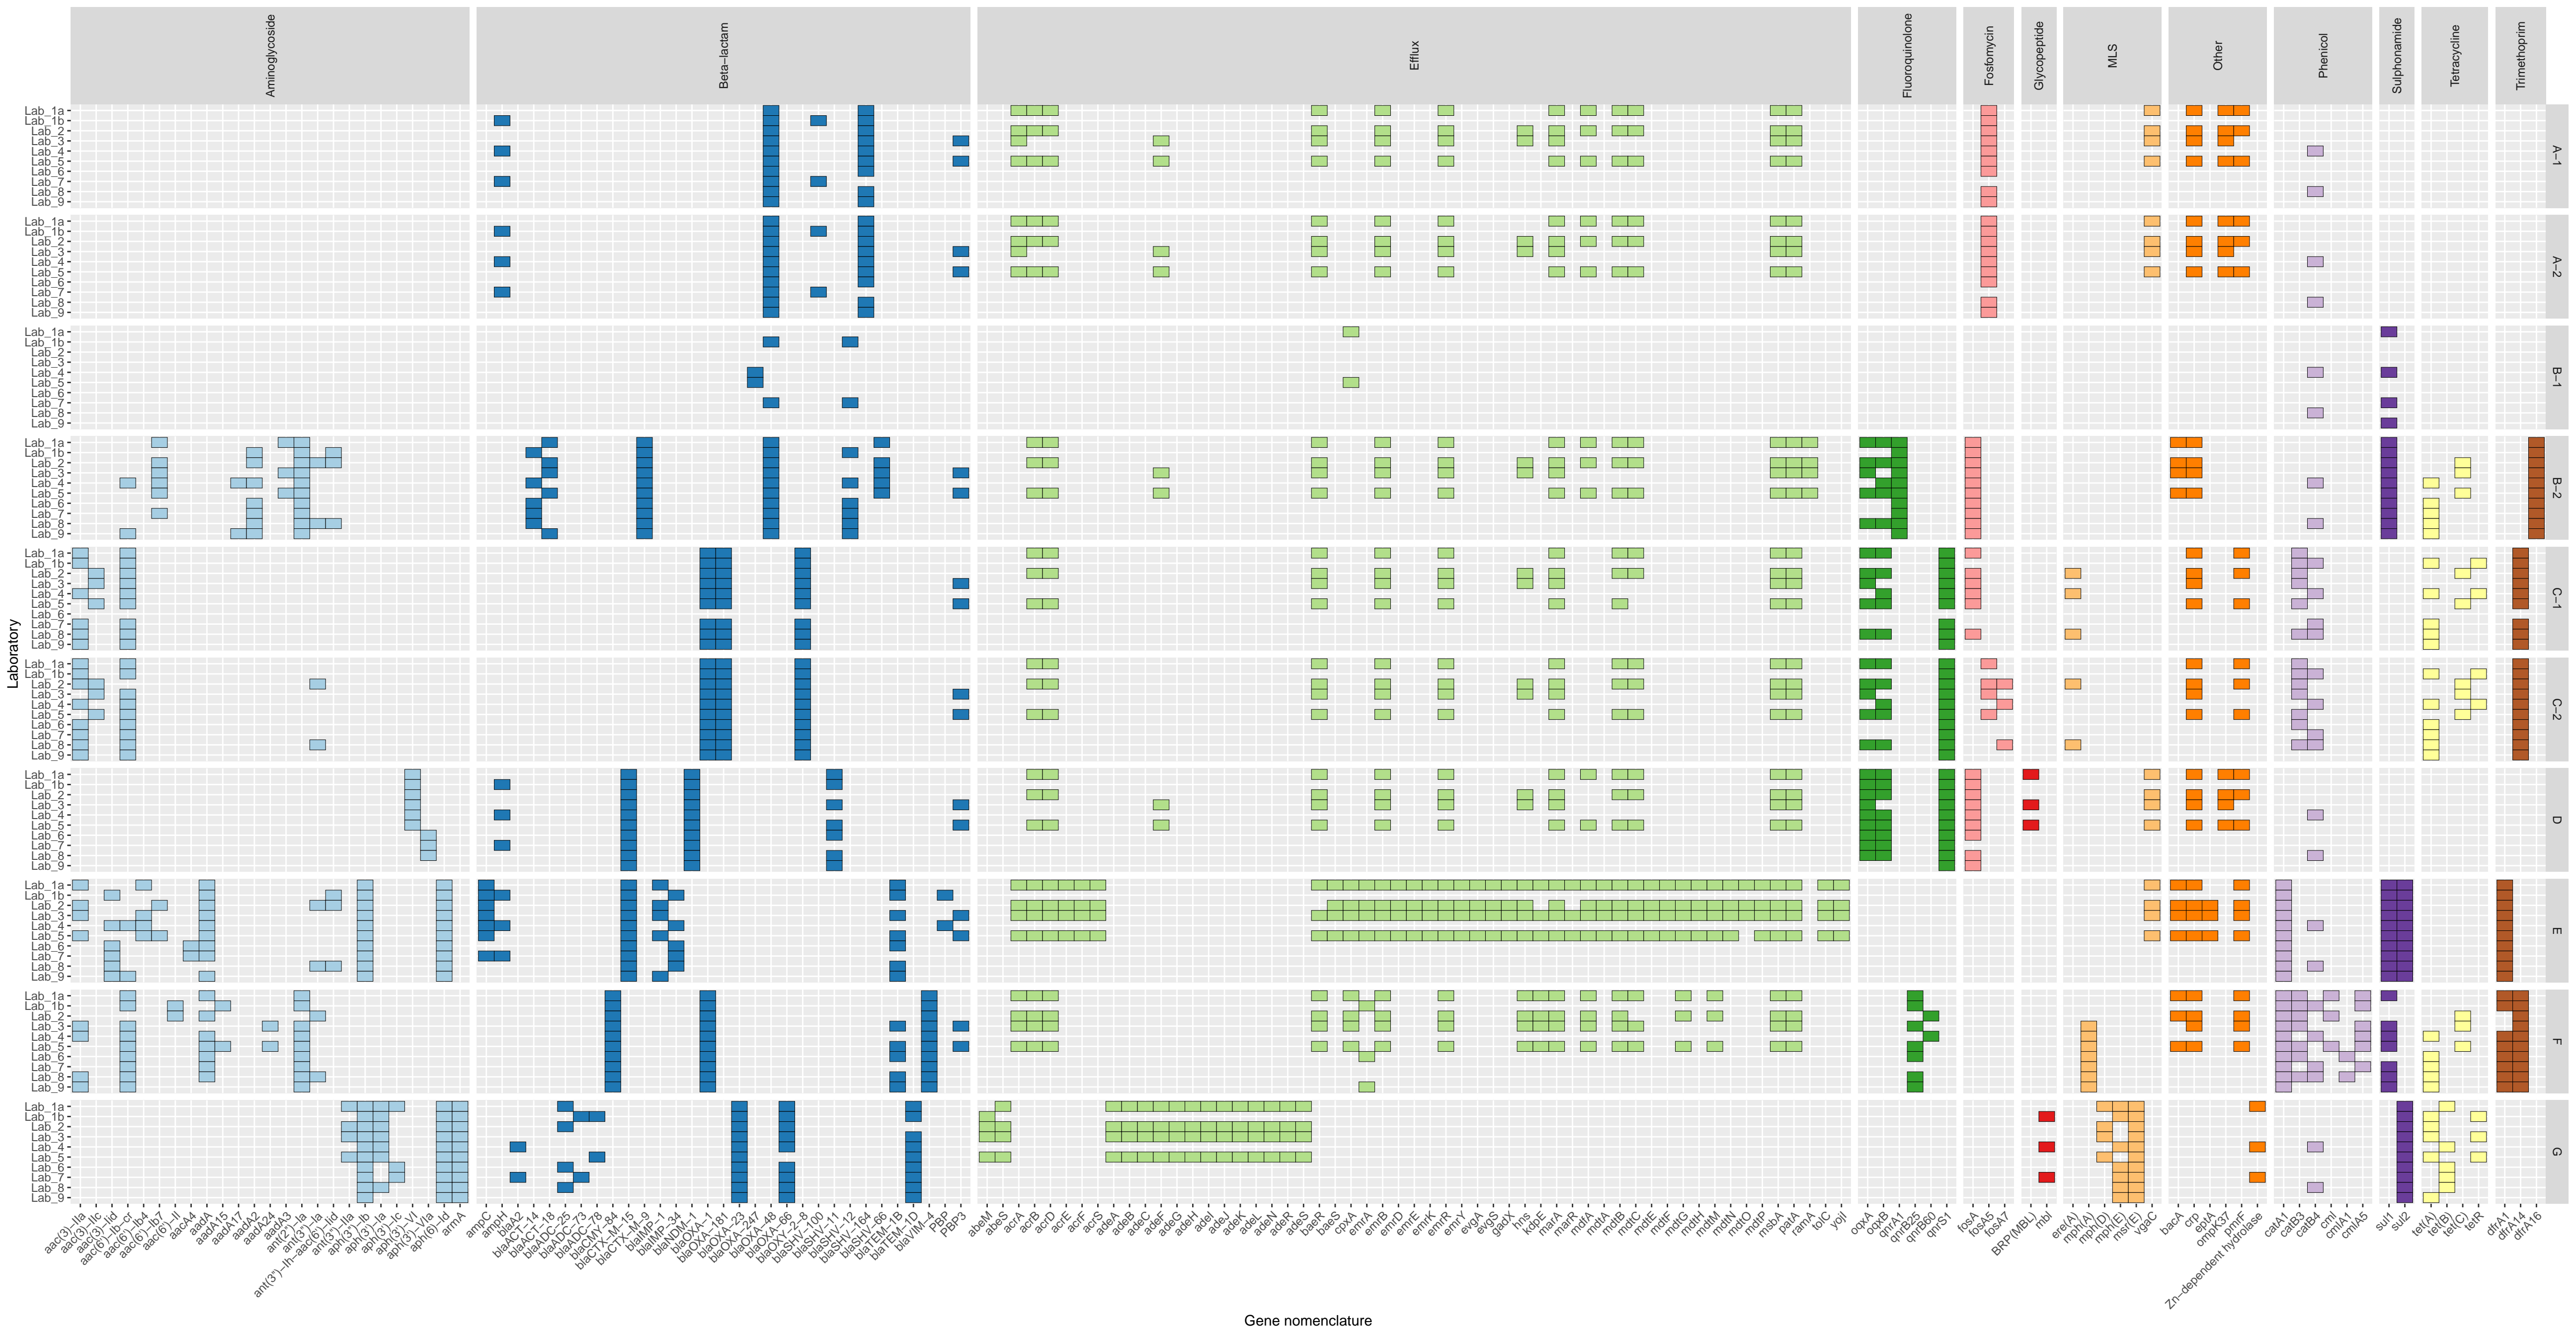

Supplement: Supplementary file [file media-3.pdf]
